# Supplementary material
Source: PubMed Central journal article supplement (PMC3341122)
Supplement: 11-8600_z7g999112290sf01.pdf [file 11-8600_z7g999112290sf01.pdf]

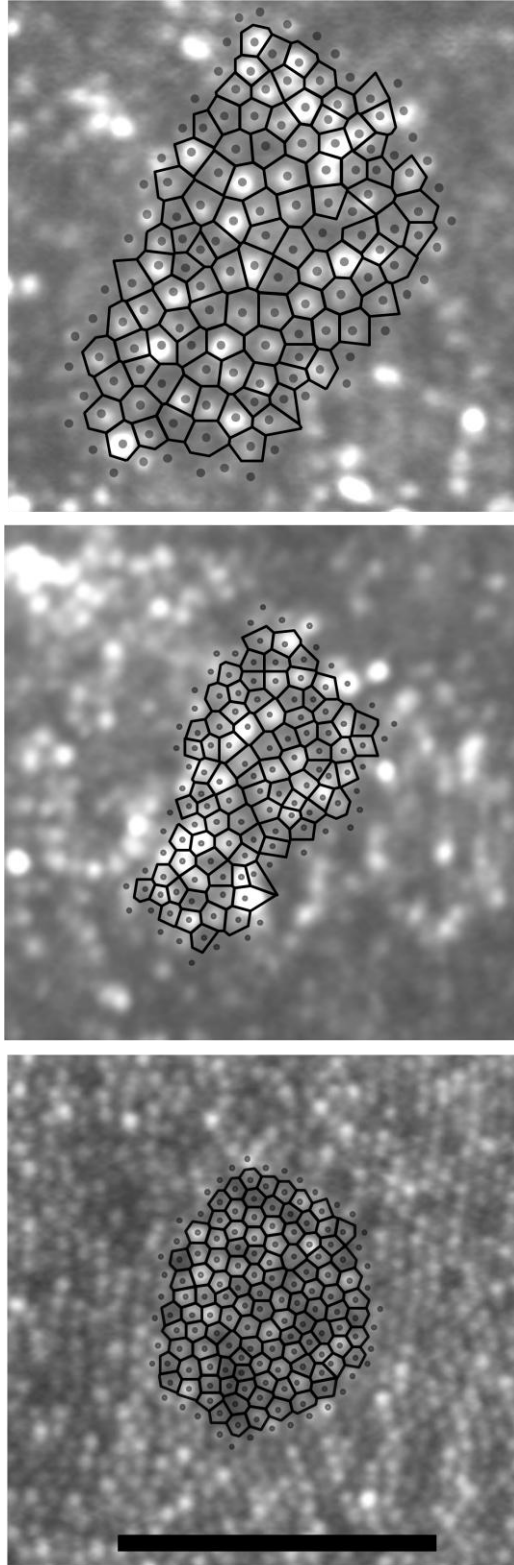

**Supplementary Figure S1:** Comparison of Voronoi patches of XLRs patient 1 (0.3 deg nasal), XLRs patient 2 (location 1.38 degrees superior) and a normal subject (Normal 1, location 1.1 degrees nasal). Cone spacing is greater than normal in the XLRs patients and the patches are less regular than in the normal eye. The scale bar is 0.25 degrees.
